# Supplementary material for: Tracking Flows of End-of-Life Battery Materials and Manufacturing Scrap
Source: MDPI journal article supplement (doi:10.3390/batteries9070360), 2023-07-04
Supplement: s1 [file s1]

Archive with 1 entries (1 files):
- batteries-2344278-supplementary.pdf
